# Supplementary material for: Outcome of COVID-19 patients treated with VV-ECMO in Tyrol during the pandemic
Source: Springer Nature journal article supplement (doi:10.1007/s00508-023-02301-5), 2023-11-10
Supplement: MOESM1 [file 26293084]

Electronic supplemental material (ESM)

**Outcome of COVID-19 patients treated with vv-ECMO in Tyrol during  
the pandemic**

**ESM table 1:** Decision making for ECMO support in COVID-19 patients (13-15)

| <b>Indications for vv-ECMO initiation</b>                   |                                                                                                       |
|-------------------------------------------------------------|-------------------------------------------------------------------------------------------------------|
| PaO <sub>2</sub> /FiO <sub>2</sub> <80mmHg for >6h*         |                                                                                                       |
| PaO <sub>2</sub> /FiO <sub>2</sub> <50mmHg for >3h*         |                                                                                                       |
| pH <7.25 with PaCO <sub>2</sub> ≥60 mmHg for 6h*            |                                                                                                       |
| <i>* after optimization of respiratory treatment</i>        |                                                                                                       |
| <b>Absolute contraindications</b>                           | <b>Relative contraindications</b>                                                                     |
| Rejection by the patient                                    | Age >65 years* (depending on the biological age)                                                      |
| Pre-existing severe neurological deficit, advanced dementia | Ventilation duration prior ECMO >7 days                                                               |
| End-stage disease (life expectancy <1 year)                 | Relevant immunosuppressive therapies                                                                  |
| Known severe brain injury                                   | Systemic hematologic disorders                                                                        |
| Age >75 years or age >70 plus ≥2 relative contraindications | Additional organ failure (except kidney)                                                              |
| End-stage lung disease                                      | Frailty                                                                                               |
| Disseminated malignancy                                     | Severe aortic regurgitation (VA ECMO)                                                                 |
| Child-Pugh C liver cirrhosis                                | Severe peripheral vascular disease (VA ECMO)                                                          |
| <1 year after allogeneic stem cell transplantation          | Chronic heart failure NYHA IV (without option for heart transplantation or ventricular assist device) |

\*Age limits possibly will have to be adapted according to the course of the pandemic

NYHA New York Heart Association

13. Wiedemann D, Bernardi MH, Distelmaier K, Goliash G, Hengstenberg C, Hermann A, et al. Recommendations for extracorporeal membrane oxygenation (ECMO) in COVID-19 patients : Consensus paper of the Medical University of Vienna. *Wien Klin Wochenschr.* 2020;132(21-22):671-6.
14. Bartlett RH, Ogino MT, Brodie D, McMullan DM, Lorusso R, MacLaren G, et al. Initial ELSO Guidance Document: ECMO for COVID-19 Patients with Severe Cardiopulmonary Failure. *ASAIO J.* 2020;66(5):472-4.
15. Badulak J, Antonini MV, Stead CM, Shekerdemian L, Raman L, Paden ML, et al. Extracorporeal Membrane Oxygenation for COVID-19: Updated 2021 Guidelines from the Extracorporeal Life Support Organization. *ASAIO J.* 2021;67(5):485-95.

**ESM table 2:** List of COVID-19 intensive care units (ICUs) in Tyrol, Austria who participated in the Tyrolean COVID-19 Intensive Care Registry (Tyrol-CoV-ICU-Reg)

|                                                               |                                                                                                                                                                                                                                                                                                                                                                                                                                                                                                                                                                                                                                                                                                                                                                                                                                                                                                                                                                                                                                                                                                                                                                                                                                                                                                                                                                                                                                                                    |
|---------------------------------------------------------------|--------------------------------------------------------------------------------------------------------------------------------------------------------------------------------------------------------------------------------------------------------------------------------------------------------------------------------------------------------------------------------------------------------------------------------------------------------------------------------------------------------------------------------------------------------------------------------------------------------------------------------------------------------------------------------------------------------------------------------------------------------------------------------------------------------------------------------------------------------------------------------------------------------------------------------------------------------------------------------------------------------------------------------------------------------------------------------------------------------------------------------------------------------------------------------------------------------------------------------------------------------------------------------------------------------------------------------------------------------------------------------------------------------------------------------------------------------------------|
| <p>Medical University Innsbruck, Innsbruck, Austria</p>       | <p>First wave:</p> <ul style="list-style-type: none"> <li>• Medical ICU, Department of Internal Medicine</li> <li>• Neurosurgical ICU, Department of Neurosurgery</li> <li>• Transplantation ICU, Department of General and Surgical Intensive Care Medicine/Department of Anesthesia and Critical Care Medicine</li> <li>• Recovery room "OZA" (adapted as temporary ICU), Department of General and Surgical Intensive Care Medicine/Department of Anesthesia and Critical Care Medicine</li> <li>• Recovery room "KHZ" (adapted as temporary ICU), Department of General and Surgical Intensive Care Medicine/Department of Anesthesia and Critical Care Medicine</li> <li>• Pediatric Intensive Care Unit, Department of Pediatrics</li> </ul> <p>Second, third and fourth wave:</p> <ul style="list-style-type: none"> <li>• Medical ICU, Department of Internal Medicine</li> <li>• Neurosurgical ICU, Department of Neurosurgery</li> <li>• Transplantation ICU, Department of General and Surgical Intensive Care Medicine/Department of Anesthesia and Critical Care Medicine</li> <li>• General surgery ICU, Department of General and Surgical Intensive Care Medicine/Department of Anesthesia and Critical Care Medicine</li> <li>• Cardiac surgery ICU, Department of General and Surgical Intensive Care Medicine/Department of Anesthesia and Critical Care Medicine</li> <li>• Pediatric Intensive Care Unit, Department of Pediatrics</li> </ul> |
| <p>Hospital Hall, Hall, Austria</p>                           | <p>ICU, Department of Anesthesia and Intensive Care Medicine</p>                                                                                                                                                                                                                                                                                                                                                                                                                                                                                                                                                                                                                                                                                                                                                                                                                                                                                                                                                                                                                                                                                                                                                                                                                                                                                                                                                                                                   |
| <p>Hospital Kufstein, Kufstein, Austria</p>                   | <p>ICU, Department of Anesthesia and Intensive Care Medicine</p>                                                                                                                                                                                                                                                                                                                                                                                                                                                                                                                                                                                                                                                                                                                                                                                                                                                                                                                                                                                                                                                                                                                                                                                                                                                                                                                                                                                                   |
| <p>Hospital Lienz, Lienz, Austria</p>                         | <p>ICU, Department of Anesthesia and Intensive Care Medicine</p>                                                                                                                                                                                                                                                                                                                                                                                                                                                                                                                                                                                                                                                                                                                                                                                                                                                                                                                                                                                                                                                                                                                                                                                                                                                                                                                                                                                                   |
| <p>Hospital Reutte, Reutte, Austria</p>                       | <p>ICU, Department of Anesthesia and Intensive Care Medicine</p>                                                                                                                                                                                                                                                                                                                                                                                                                                                                                                                                                                                                                                                                                                                                                                                                                                                                                                                                                                                                                                                                                                                                                                                                                                                                                                                                                                                                   |
| <p>Hospital Schwaz, Schwaz, Austria</p>                       | <p>ICU, Department of Anesthesia and Critical Care Medicine</p>                                                                                                                                                                                                                                                                                                                                                                                                                                                                                                                                                                                                                                                                                                                                                                                                                                                                                                                                                                                                                                                                                                                                                                                                                                                                                                                                                                                                    |
| <p>Hospital St. Johann i.T., St. Johann in Tyrol, Austria</p> | <p>ICU, Department of Anesthesia and Intensive Care Medicine</p>                                                                                                                                                                                                                                                                                                                                                                                                                                                                                                                                                                                                                                                                                                                                                                                                                                                                                                                                                                                                                                                                                                                                                                                                                                                                                                                                                                                                   |
| <p>Hospital Zams</p>                                          | <p>Medical ICU, Department of Internal Medicine</p> <p>Surgical ICU, Department of Anesthesiology and Critical Care Medicine</p>                                                                                                                                                                                                                                                                                                                                                                                                                                                                                                                                                                                                                                                                                                                                                                                                                                                                                                                                                                                                                                                                                                                                                                                                                                                                                                                                   |
